# Supplementary material for: Regionalisation of the mouse visceral endoderm as the blastocyst transforms into the egg cylinder
Source: PubMed Central journal article supplement (PMC1978209; doi:10.1186/1471-213x-7-96), 2007-08-16

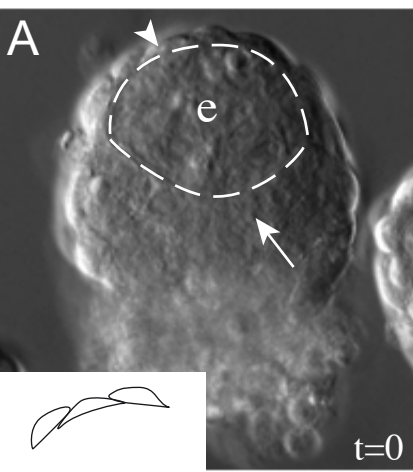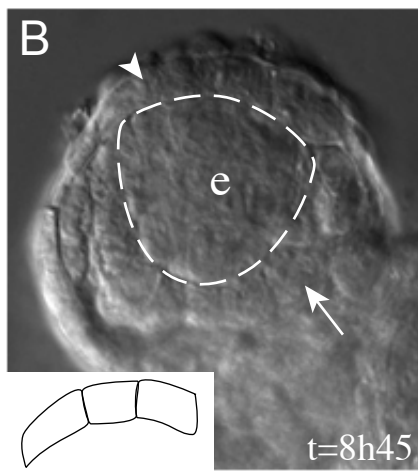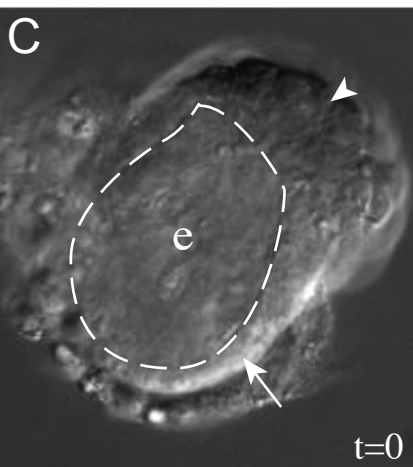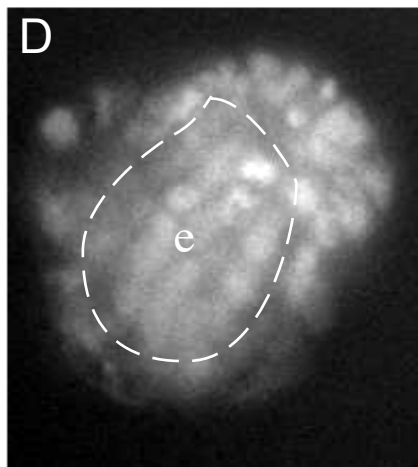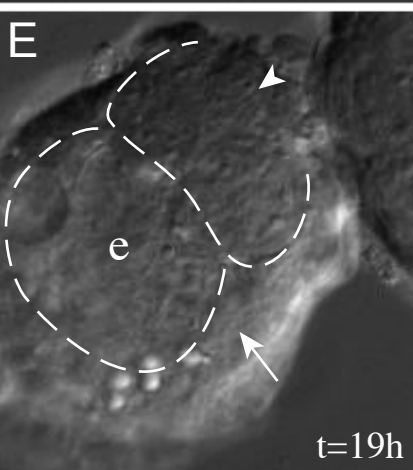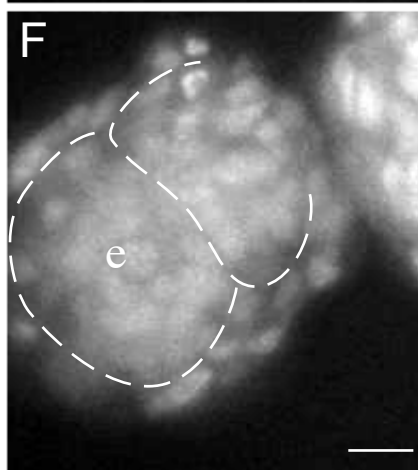

Supplement: 1471-213X-7-96-S1.pdf [file 1471-213X-7-96-S1.pdf]
