# Supplementary material for: Regionalisation of the mouse visceral endoderm as the blastocyst transforms into the egg cylinder
Source: PubMed Central journal article supplement (PMC1978209; doi:10.1186/1471-213x-7-96), 2007-08-16

| Stage                  | Nb of blastocysts injected | Nb of positive blastocysts transferred | Nb of conceptuses recovered | Nb of labelled conceptuses recovered |
|------------------------|----------------------------|----------------------------------------|-----------------------------|--------------------------------------|
| E4.7-E5.0 (IB+PEC+EEC) | 601                        | 248                                    | 178                         | 92 (24 <sup>#</sup> )                |
| E5.5 wt (D+L/D+L)      | 709                        | 231                                    | 150                         | 68 (48 <sup>#</sup> )                |
| E5.5 Cer               | 319                        | 149                                    | 109                         | 29                                   |
| E6.5*                  | 496                        | 263                                    | 129                         | 31                                   |
| <b>Total</b>           | <b>2125</b>                | <b>891</b>                             | <b>566</b>                  | <b>220</b>                           |

<sup>#</sup> In brackets, nb of embryos analysed with labelled VE cells. Only E4.7-E5.0 conceptuses which had a clearly visible extra-embryonic region (EEC stage) were considered.

\*Frequencies as in Weber et al., 1999

| Injected mRNA | Stage     | Percentage of labelled conceptuses among the recovered |
|---------------|-----------|--------------------------------------------------------|
| nlsGFP        | E4.7-E5.0 | 50%                                                    |
| nlsDsRed      | E4.7-E5.0 | 53%                                                    |
| MmGFP         | E5.5      | 45%                                                    |
| nlsDsRed      | E5.5      | 27%                                                    |

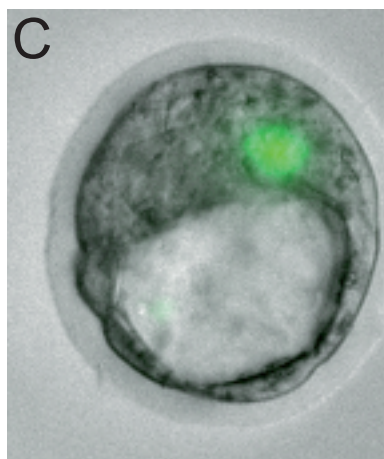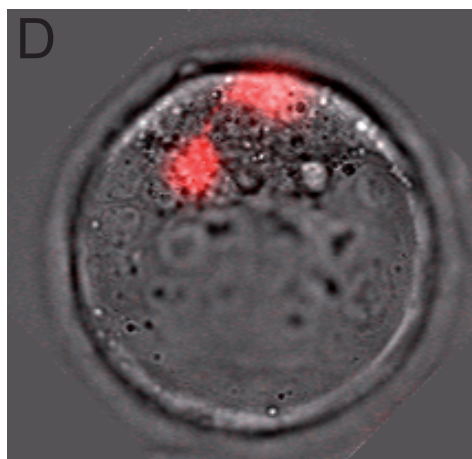

Supplement: 1471-213X-7-96-S2.pdf [file 1471-213X-7-96-S2.pdf]
